# Supplementary material for: Effect of polyoxoanions and amide group coordination modes on the assembly of polyoxometalate-based metal–organic complexes constructed from a semi-rigid bis-pyridyl-bis-amide ligand
Source: Royal Society of Chemistry journal article supplement (doi:10.1039/c4ce01933d), 2014-11-24
Supplement: c4ce01933d1.pdf [file c4ce01933d1.pdf]

Supplementary Material (ESI) for CrystEngComm  
This journal is © The Royal Society of Chemistry

## Effect of polyoxoanions and amide groups coordination modes on the assembly of polyoxometalate-based metal- organic complexes constructed from a semi-rigid bis- pyridyl-bis-amide ligand

Xiuli Wang,<sup>\*a</sup> Zhihan Chang, Hongyan Lin, Aixiang Tian, Guocheng Liu, Juwen Zhang,  
Danna Liu

Table S1. Selected bond distances (Å) and angles (°) for complexes 1–4.

| Complex 1         |           |                   |           |
|-------------------|-----------|-------------------|-----------|
| Cu(1)–N(1)        | 1.995(12) | Cu(1)–N(4)        | 1.974(12) |
| Cu(1)–O(1)        | 2.027(9)  | Cu(1)–O(1W)       | 2.054(10) |
| Cu(1)–O(2)        | 2.274(9)  | O(1)–Cu(1)–O(1W)  | 159.9(4)  |
| N(4)–Cu(1)–N(1)   | 173.5(5)  | N(4)–Cu(1)–O(2)   | 97.6(4)   |
| N(4)–Cu(1)–O(1)   | 85.8(4)   | N(1)–Cu(1)–O(2)   | 88.6(4)   |
| N(1)–Cu(1)–O(1)   | 94.5(4)   | O(1)–Cu(1)–O(2)   | 102.7(4)  |
| N(4)–Cu(1)–O(1W)  | 85.1(5)   | O(1W)–Cu(1)–O(2)  | 96.2(4)   |
| N(1)–Cu(1)–O(1W)  | 92.6(5)   |                   |           |
| Complex 2         |           |                   |           |
| Cu(1)–O(1)        | 2.507(11) | Cu(1)–N(1)        | 1.994(13) |
| Cu(1)–O(1W)       | 2.028(12) | Cu(1)–O(2W)       | 2.234(12) |
| Cu(1)–N(2)        | 2.003(15) | Cu(1)–O(3W)       | 1.983(11) |
| O(1)–Cu(1)–N(1)   | 94.91(5)  | O(1)–Cu(1)–N(2)   | 88.83(5)  |
| O(1)–Cu(1)–O(1W)  | 84.89(6)  | O(1)–Cu(1)–O(2W)  | 174.64(5) |
| O(3W)–Cu(1)–O(1)  | 92.51(5)  | O(3W)–Cu(1)–N(1)  | 88.9(5)   |
| O(3W)–Cu(1)–N(2)  | 91.8(5)   | O(3W)–Cu(1)–O(2W) | 92.8(5)   |
| N(1)–Cu(1)–N(2)   | 173.2(6)  | N(1)–Cu(1)–O(2W)  | 95.7(6)   |
| O(1W)–Cu(1)–N(1)  | 87.53(6)  | O(1W)–Cu(1)–N(2)  | 91.41(5)  |
| O(1W)–Cu(1)–O(2W) | 89.83(5)  | O(1W)–Cu(1)–O(3W) | 175.79(5) |
| N(2)–Cu(1)–O(2W)  | 90.93(6)  |                   |           |
| Complex 3         |           |                   |           |
| Cu(1)–O(1)        | 2.529(12) | Cu(1)–O(1W)       | 2.001(15) |
| Cu(1)–O(2W)       | 2.264(15) | Cu(1)–O(3W)       | 1.976(14) |
| Cu(1)–N(1)        | 2.005(16) | Cu(1)–N(2)        | 1.978(19) |
| O(3W)–Cu(1)–N(2)  | 91.8(7)   | N(2)–Cu(1)–O(2W)  | 91.5(8)   |
| O(3W)–Cu(1)–N(1)  | 87.5(6)   | N(1)–Cu(1)–O(2W)  | 95.3(7)   |
| N(2)–Cu(1)–N(1)   | 173.1(7)  | O(2W)–Cu(1)–O(1W) | 89.6(7)   |
| O(1W)–Cu(1)–O(3W) | 175.4(7)  | N(1)–Cu(1)–O(1W)  | 88.4(7)   |
| N(2)–Cu(1)–O(1W)  | 91.9(7)   | O(2W)–Cu(1)–O(3W) | 92.9(7)   |

**Supplementary Material (ESI) for CrystEngComm**  
**This journal is © The Royal Society of Chemistry**

|                     |           |                    |           |
|---------------------|-----------|--------------------|-----------|
| O(1)–Cu(1)–O(1W)    | 92.5(7)   | O(1)–Cu(1)–O(2W)   | 85.1(7)   |
| O(1)–Cu(1)–O(3W)    | 174.7(7)  | O(1)–Cu(1)–N(1)    | 85.2(7)   |
| O(1)–Cu(1)–N(4)     | 88.0(6)   |                    |           |
| Complex 4           |           |                    |           |
| Cu(1)–O(1)          | 1.986(9)  | Cu(1)–N(4)#2       | 2.009(10) |
| Cu(1)–O(1W)         | 1.991(10) | Cu(1)–O(2)         | 2.364(9)  |
| Cu(1)–N(1)          | 2.001(10) | Cu(1)–O(3)#2       | 2.425(8)  |
| K(1)–O(13)          | 1.739(11) | Mo(1)–O(9)         | 1.694(9)  |
| K(1)–O(4)           | 1.926(12) | Mo(1)–O(7)         | 1.707(9)  |
| K(1)–O(8)           | 2.115(12) | Mo(1)–O(10)        | 1.935(8)  |
| K(1)–O(12)          | 2.280(14) | Mo(1)–O(5)         | 1.949(8)  |
| K(1)–O(9)           | 2.446(10) | Mo(1)–O(6)         | 2.246(8)  |
| K(1)–O(6)           | 2.450(8)  | Mo(1)–O(6)#1       | 2.322(8)  |
| Mo(2)–O(16)         | 1.657(9)  | Mo(3)–O(3)         | 1.695(8)  |
| Mo(2)–O(12)         | 1.768(10) | Mo(3)–O(8)         | 1.723(10) |
| Mo(2)–O(11)         | 1.828(9)  | Mo(3)–O(14)        | 1.827(9)  |
| Mo(2)–O(5)          | 2.065(8)  | Mo(3)–O(10)        | 2.097(9)  |
| Mo(2)–O(10)#1       | 2.254(8)  | Mo(3)–O(5)#1       | 2.295(8)  |
| Mo(2)–O(6)          | 2.351(8)  | Mo(3)–O(6)         | 2.306(8)  |
| Mo(4)–O(1)          | 1.706(9)  | Mo(4)–O(4)         | 1.769(11) |
| Mo(4)–O(11)         | 1.973(9)  | Mo(4)–O(6)         | 2.348(8)  |
| Mo(4)–O(14)         | 1.990(10) | Mo(4)–O(7)#1       | 2.378(10) |
| O(1)–Cu(1)–O(1W)    | 176.0(4)  | O(2)–Cu(1)–O(3)#2  | 167.3(3)  |
| O(1)–Cu(1)–N(1)     | 87.0(4)   | O(9)–Mo(1)–O(7)    | 105.2(5)  |
| O(1W)–Cu(1)–N(1)    | 91.3(4)   | O(9)–Mo(1)–O(10)   | 99.9(4)   |
| O(1)–Cu(1)–N(4)#2   | 91.4(4)   | O(7)–Mo(1)–O(10)   | 98.1(4)   |
| O(1W)–Cu(1)–N(4)#2  | 90.6(4)   | O(9)–Mo(1)–O(5)    | 100.5(4)  |
| N(1)–Cu(1)–N(4)#2   | 175.6(4)  | O(7)–Mo(1)–O(5)    | 98.3(4)   |
| O(1)–Cu(1)–O(2)     | 84.8(4)   | O(10)–Mo(1)–O(5)   | 149.4(3)  |
| O(1W)–Cu(1)–O(2)    | 91.6(4)   | O(9)–Mo(1)–O(6)    | 92.7(4)   |
| N(1)–Cu(1)–O(2)     | 90.7(4)   | O(7)–Mo(1)–O(6)    | 162.1(4)  |
| N(4)#2–Cu(1)–O(2)   | 93.2(4)   | O(10)–Mo(1)–O(6)   | 78.2(3)   |
| O(1)–Cu(1)–O(3)#2   | 83.0(3)   | O(5)–Mo(1)–O(6)    | 78.2(3)   |
| O(1W)–Cu(1)–O(3)#2  | 100.7(4)  | O(9)–Mo(1)–O(6)#1  | 169.3(4)  |
| N(1)–Cu(1)–O(3)#2   | 92.2(4)   | O(7)–Mo(1)–O(6)#1  | 85.5(4)   |
| N(4)#2–Cu(1)–O(3)#2 | 83.5(4)   | O(10)–Mo(1)–O(6)#1 | 77.7(3)   |
| O(11)–Mo(2)–O(6)    | 79.2(4)   | O(5)–Mo(1)–O(6)#1  | 78.1(3)   |
| O(5)–Mo(2)–O(6)     | 73.6(3)   | O(6)–Mo(1)–O(6)#1  | 76.6(3)   |
| O(10)#1–Mo(2)–O(6)  | 71.3(3)   | O(13)–K(1)–O(4)    | 104.6(6)  |
| O(3)–Mo(3)–O(8)     | 104.0(5)  | O(13)–K(1)–O(8)    | 101.2(6)  |
| O(3)–Mo(3)–O(14)    | 103.9(5)  | O(4)–K(1)–O(8)     | 99.6(4)   |
| O(8)–Mo(3)–O(14)    | 101.6(5)  | O(13)–K(1)–O(12)   | 98.8(5)   |
| O(3)–Mo(3)–O(10)    | 97.2(4)   | O(4)–K(1)–O(12)    | 94.3(4)   |
| O(8)–Mo(3)–O(10)    | 94.9(4)   | O(8)–K(1)–O(12)    | 151.8(4)  |

|                    |          |                     |          |
|--------------------|----------|---------------------|----------|
| O(13)–K(1)–O(9)    | 95.4(5)  | O(4)–K(1)–O(9)      | 159.6(4) |
| O(8)–K(1)–O(9)     | 79.8(4)  | O(12)–K(1)–O(9)     | 78.7(4)  |
| O(13)–K(1)–O(6)    | 167.3(5) | O(4)–K(1)–O(6)      | 87.8(4)  |
| O(8)–K(1)–O(6)     | 78.4(3)  | O(12)–K(1)–O(6)     | 77.8(3)  |
| O(9)–K(1)–O(6)     | 72.0(3)  | O(11)–Mo(2)–O(5)    | 149.5(4) |
| O(14)–Mo(3)–O(10)  | 149.1(4) | O(16)–Mo(2)–O(12)   | 104.3(6) |
| O(3)–Mo(3)–O(5)#1  | 92.1(3)  | O(16)–Mo(2)–O(11)   | 103.7(5) |
| O(8)–Mo(3)–O(5)#1  | 160.0(4) | O(12)–Mo(2)–O(11)   | 100.7(4) |
| O(14)–Mo(3)–O(5)#1 | 85.5(4)  | O(16)–Mo(2)–O(5)    | 98.6(4)  |
| O(10)–Mo(3)–O(5)#1 | 71.1(3)  | O(12)–Mo(2)–O(5)    | 93.5(4)  |
| O(3)–Mo(3)–O(6)    | 163.5(4) | O(12)–Mo(2)–O(6)    | 91.2(5)  |
| O(8)–Mo(3)–O(6)    | 90.7(4)  | O(16)–Mo(2)–O(10)#1 | 92.2(4)  |
| O(14)–Mo(3)–O(6)   | 80.0(4)  | O(12)–Mo(2)–O(10)#1 | 159.9(5) |
| O(10)–Mo(3)–O(6)   | 73.8(3)  | O(11)–Mo(2)–O(10)#1 | 86.0(4)  |
| O(5)#1–Mo(3)–O(6)  | 72.0(3)  | O(5)–Mo(2)–O(10)#1  | 72.5(3)  |
| O(1)–Mo(4)–O(4)    | 106.8(5) | O(16)–Mo(2)–O(6)    | 163.2(4) |
| O(1)–Mo(4)–O(11)   | 100.1(4) | O(6)–Mo(4)–O(7)#1   | 71.8(3)  |
| O(4)–Mo(4)–O(11)   | 96.8(4)  | O(1)–Mo(4)–O(7)#1   | 86.5(4)  |
| O(1)–Mo(4)–O(14)   | 100.3(4) | O(4)–Mo(4)–O(7)#1   | 166.7(4) |
| O(4)–Mo(4)–O(14)   | 99.4(5)  | O(11)–Mo(4)–O(7)#1  | 79.8(3)  |
| O(11)–Mo(4)–O(14)  | 149.0(4) | O(14)–Mo(4)–O(7)#1  | 78.4(4)  |
| O(1)–Mo(4)–O(6)    | 158.3(4) | O(11)–Mo(4)–O(7)#1  | 79.8(3)  |
| O(4)–Mo(4)–O(6)    | 94.9(4)  | O(14)–Mo(4)–O(6)    | 75.9(3)  |
| O(11)–Mo(4)–O(6)   | 76.6(3)  |                     |          |

Symmetry code: #1 -x, y+1, -z/2; #2 x+1/2, -y+1/2, z+1/2.

**Table S2.** Selected hydrogen-bonding geometry (Å, °) for complex **1**

| D–H...A               | D–H  | H...A | D...A | D–H...A |
|-----------------------|------|-------|-------|---------|
| C(10)–H(10B)...O(13), | 0.97 | 2.44  | 3.32  | 151     |

**Table S3.** Selected hydrogen-bonding geometry (Å, °) for complex **2**

| D–H...A              | D–H  | H...A | D...A  | D–H...A |
|----------------------|------|-------|--------|---------|
| C(14)–H(14B)...O(11) | 0.97 | 2.45  | 3.2294 | 137     |

**Table S4.** Selected hydrogen-bonding geometry (Å, °) for complex **3**

| D–H...A              | D–H  | H...A | D...A  | D–H...A |
|----------------------|------|-------|--------|---------|
| C(15)–H(15B)...O(23) | 0.97 | 2.47  | 3.2465 | 137     |

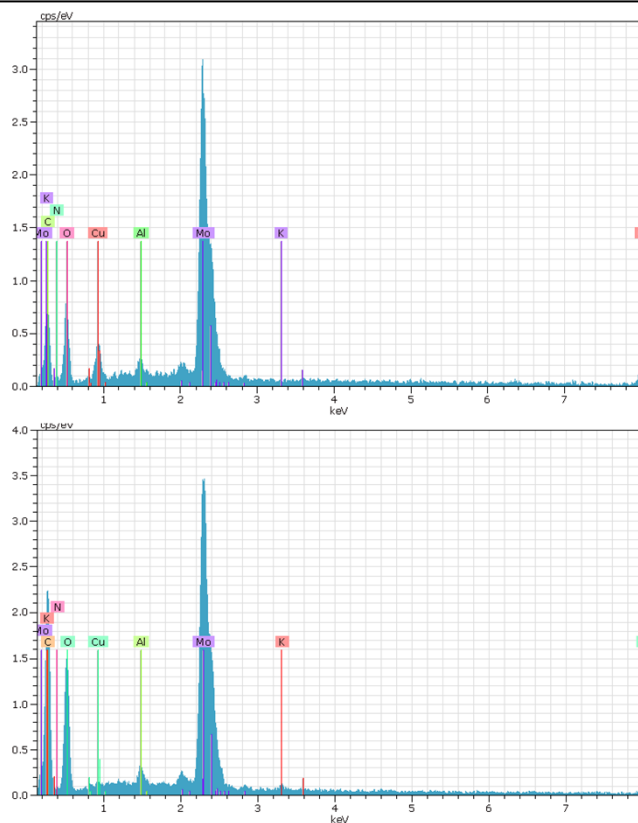

Fig. S1 The EDS spectra of single crystal of **4**.

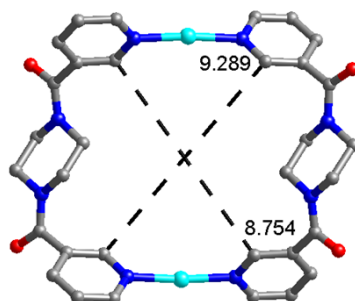

Fig. S2 The [Cu<sub>2</sub>L<sub>2</sub>] metal-organic loop in **1**.

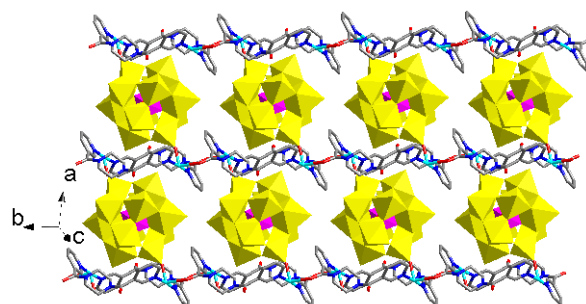

Fig. S3 The 2D layer in **1**.

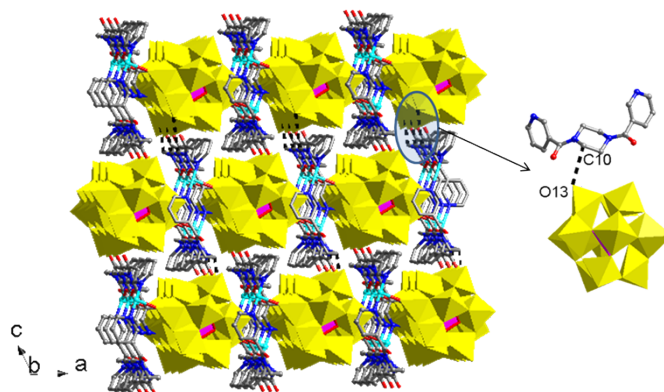

Fig. S4 The 3D supramolecular framework of **1**.

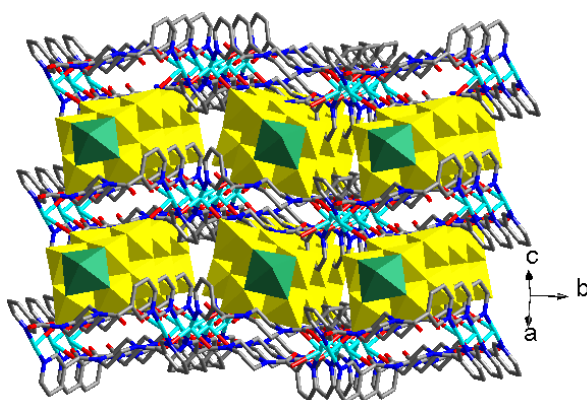

Fig. S5 The 3D framework of **4**.

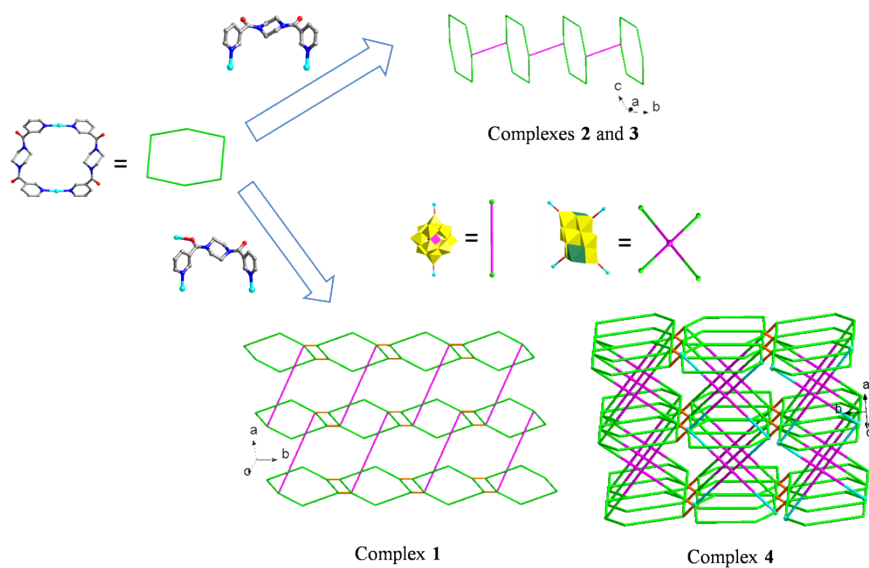

Fig. S6 View of the scheme of complexes **1–4** showing the influence of the coordination modes of L ligand and polyoxoanions on the structures

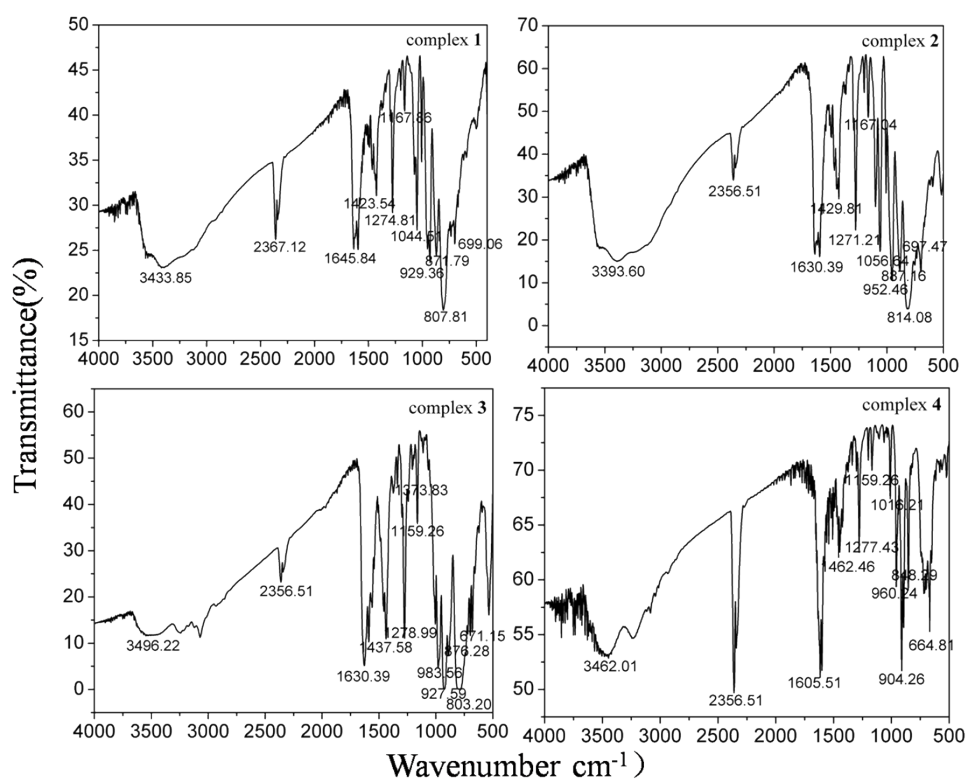

Fig. S7 The IR spectra of the title complexes.

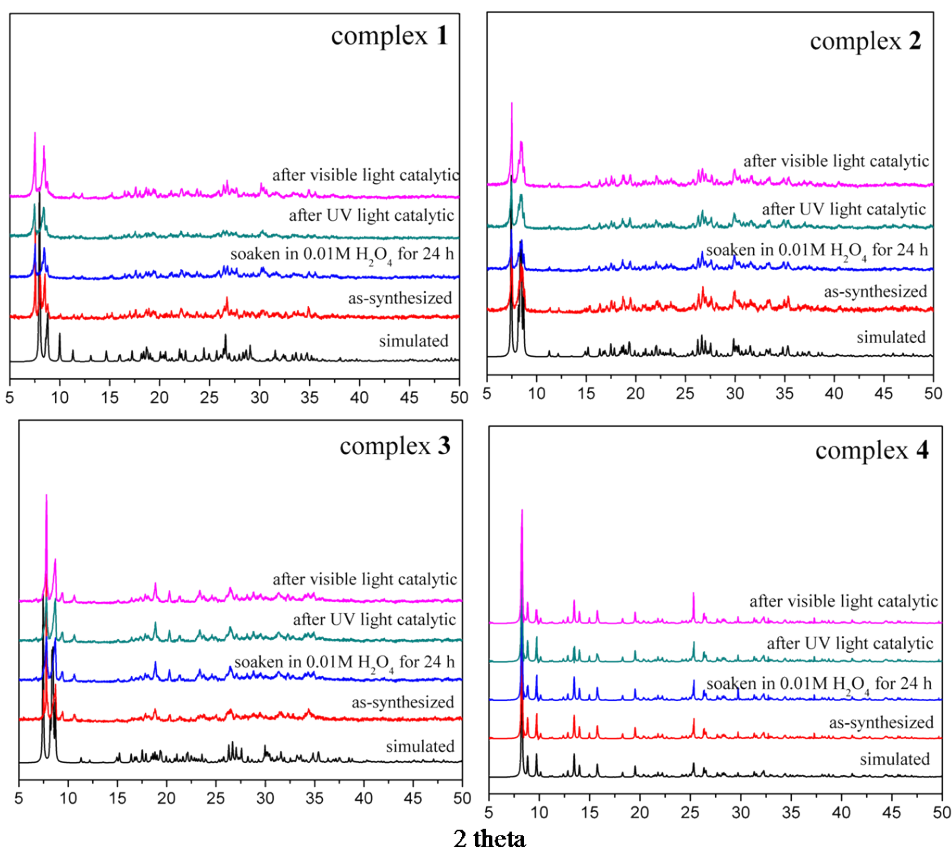

Fig. S8 Powder X-ray diffraction patterns of the title complexes.

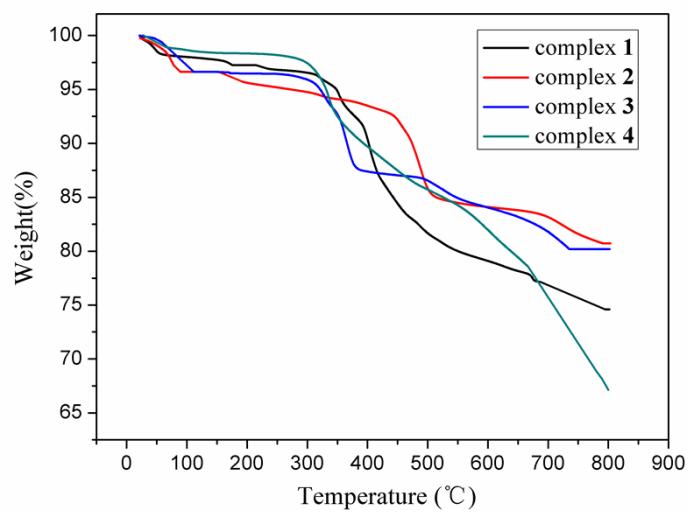

**Fig. S9** The TGA curves of the title complexes.

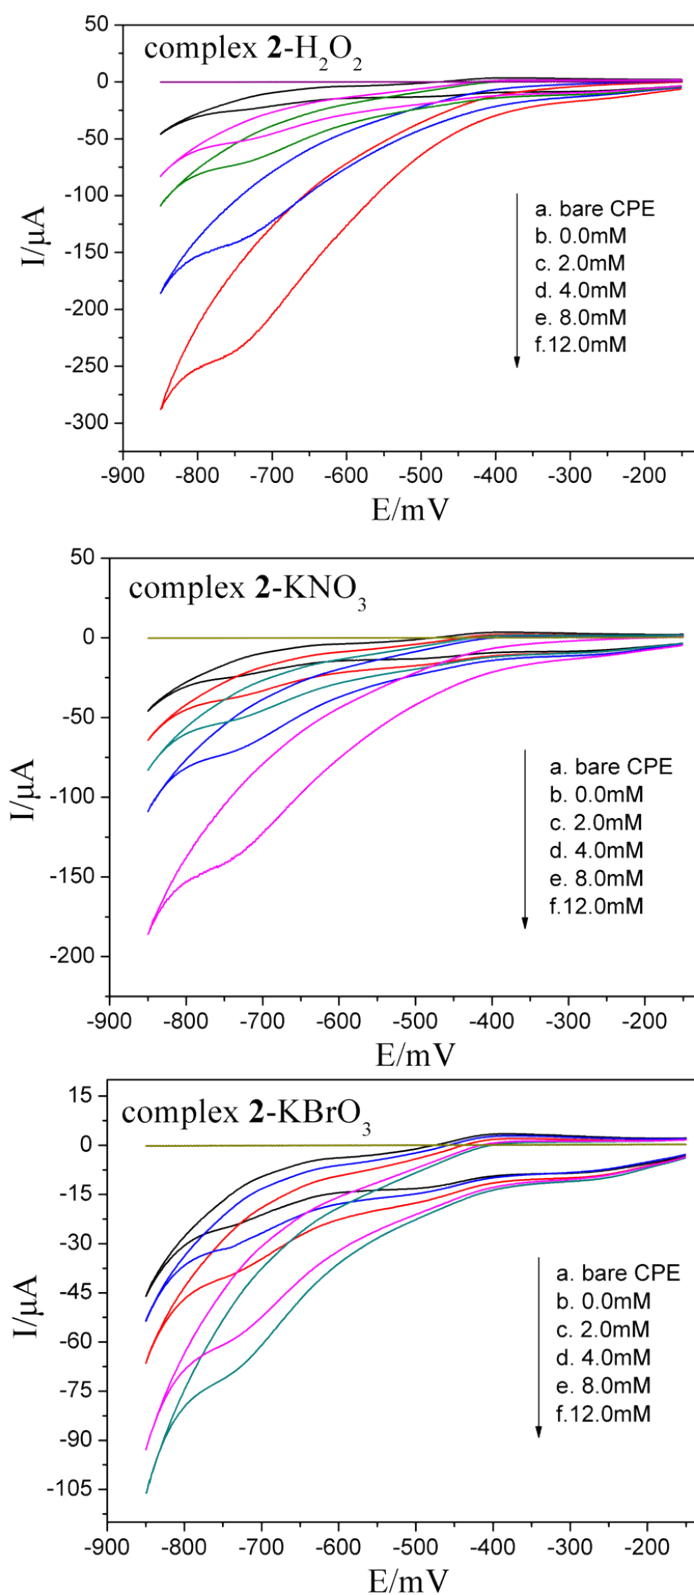

**Fig. S10** Cyclic voltammograms of 2-CPE in 0.01 M  $\text{H}_2\text{SO}_4$  aqueous solution containing 0.0 - 12.0 mM  $\text{H}_2\text{O}_2/\text{KNO}_2/\text{KBrO}_3$ . Scan rate:  $200 \text{ mV}\cdot\text{s}^{-1}$ .



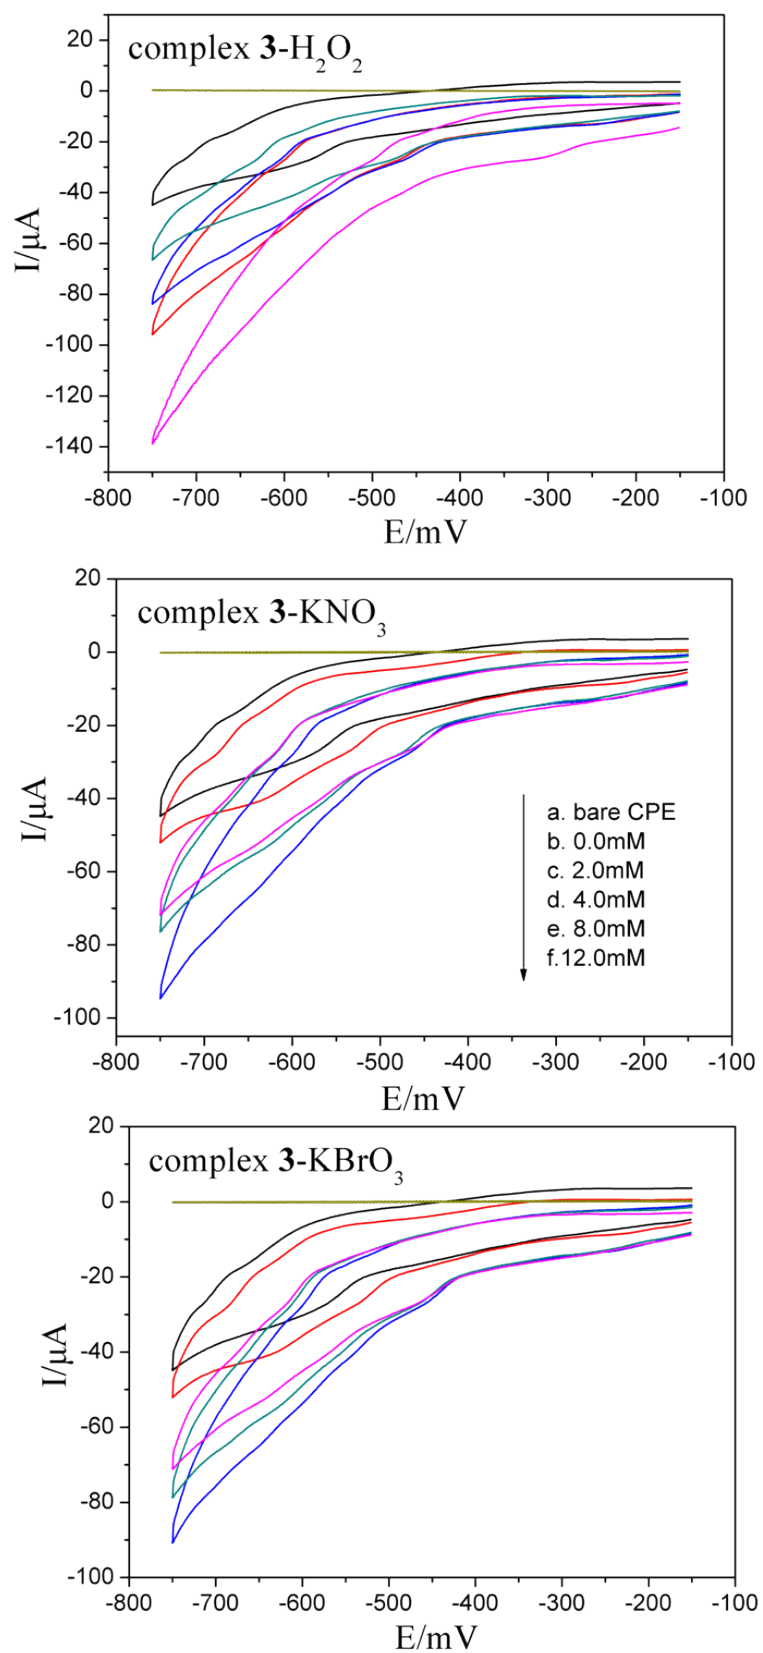

**Fig. S11** Cyclic voltammograms of 3-CPE in 0.01 M H<sub>2</sub>SO<sub>4</sub> aqueous solution containing 0.0 - 12.0 mM H<sub>2</sub>O<sub>2</sub>/KNO<sub>2</sub>/KBrO<sub>3</sub>. Scan rate: 200 mV·s<sup>-1</sup>

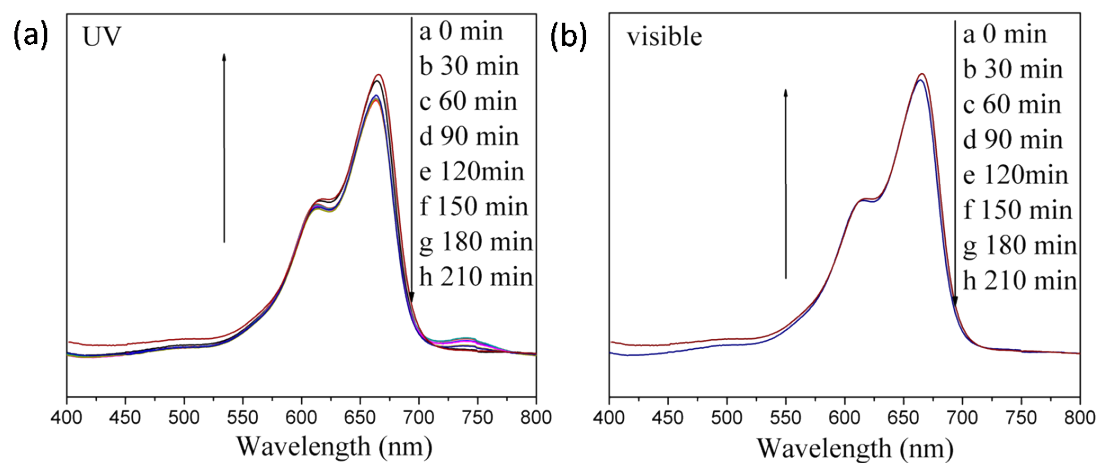

**Fig. S12** Absorption spectra of the MB solution during the decomposition reaction under UV and visible irradiation without complex

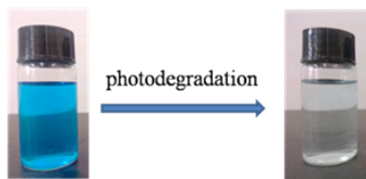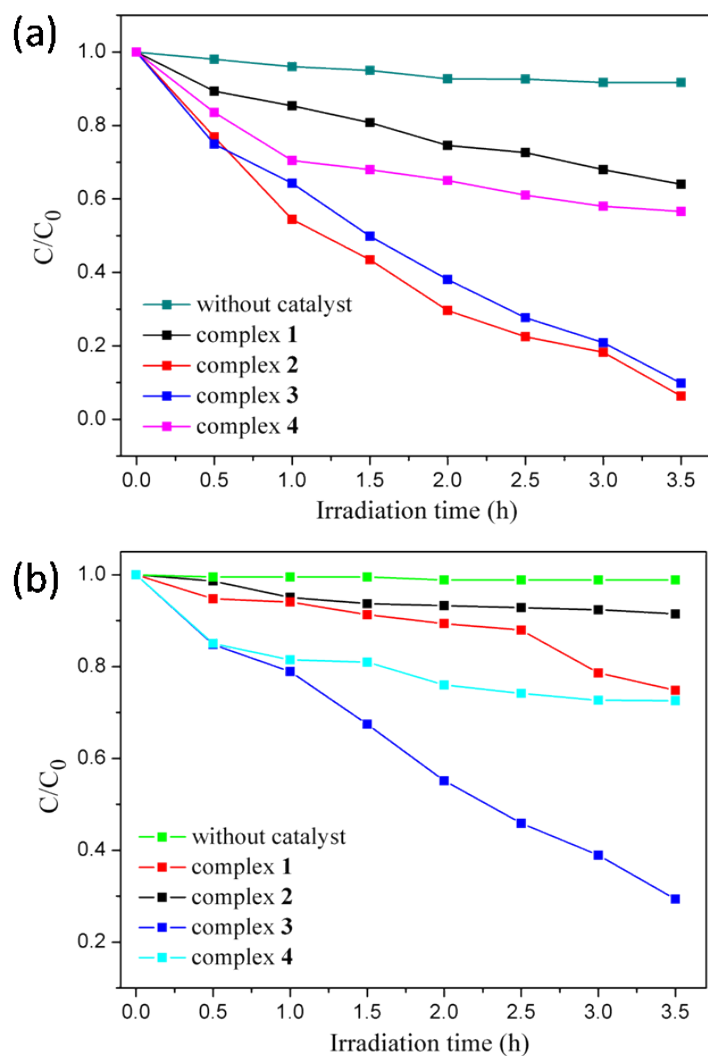

**Fig. S13** Photocatalytic decomposition rate of MB solution under UV (a), and visible (b) irradiation with the use of title complexes.

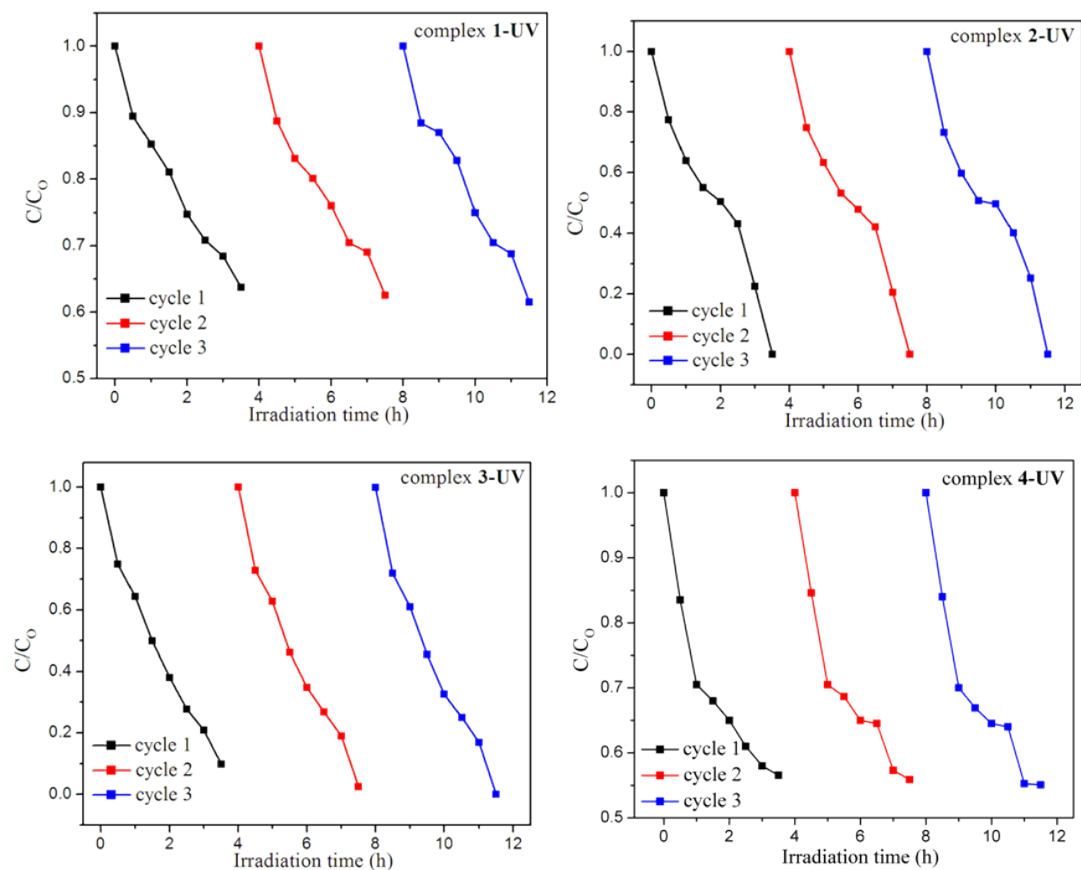

**Fig. S14.** Three times of MB degradation test under UV irradiation by the title complexes.
